# Supplementary material for: A Taxonomy for Three-Terminal Tandem Solar Cells
Source: ACS Energy Lett. 2020 Mar 23;5(4):1233–42. doi: 10.1021/acsenergylett.0c00068 (PMC10906945; doi:10.1021/acsenergylett.0c00068)
Supplement: Supplementary file 1 — nz0c00068_si_001.pdf [file nz0c00068_si_001.pdf]

# Supporting Information: A taxonomy for three terminal tandem solar cells

Emily L. Warren,<sup>\*,†</sup> William E. McMahon,<sup>†</sup> Michael Rienäcker,<sup>‡</sup> Kaitlyn T. VanSant,<sup>†,¶</sup> Riley C. Whitehead,<sup>†</sup> Robby Peibst,<sup>‡</sup> and Adele C. Tamboli<sup>†</sup>

<sup>†</sup>*National Renewable Energy Laboratory*

<sup>‡</sup>*Institute for Solar Energy Research Hamelin*

<sup>¶</sup>*Colorado School of Mines*

E-mail: emily.warren@nrel.gov

## Supporting Information Available

### 3TT devices from the literature

Many different variations of 3TT devices have been reported in the literature. While the following list in Table S1 is not exhaustive, it provides a summary of how different proposed devices would be named using our 3TT taxonomy. Papers are listed in chronological order by first author. The reference number from the main text, device taxonomy, and indication of whether report was based on simulated or experimental results are provided for each publication.

### Simulation Details

All of the simulated Si data presented was generated using the methods described by Warren et al. in prior publications.<sup>1,2</sup> The simulated performance of these device closely

Table S1: Summary of literature reports of 3T and 3TT devices listed in chronological order. The taxonomy for each device is listed, as well as whether the paper produced an experimental device or was a simulation.

| Author/Year     | Ref.   | Experiment or Simulation  | 3TT Taxonomy                                                     |
|-----------------|--------|---------------------------|------------------------------------------------------------------|
| Chiang 1978     | 6      | Experiment                | Single junction pbIBC Si                                         |
| Sakai 1980      | 19     | Simulation                | InP/r/InGaAsP( $p/n$ )                                           |
| Flores 1983     | 20     | Experiment                | AlGaAs/r/GaAs( $n/p$ )                                           |
| Fraas 1984      | 22     | Patent                    | GaAsP/r/GaAsSb( $p/n$ )                                          |
| Wanlass 1991    | 24     | Simulation                | InP/r/GaInAs( $p/n$ )                                            |
| Soga 1996       | 25     | Experiment                | GaAs/r/Si( $n/p$ )                                               |
| Nagashima 2000  | 4      | Simulation                | AlGaAs/r/puIBC-Si                                                |
| Sista 2010      | 27     | Experiment                | P3HT/r/PSBTBT( $p/n$ )<br>P3HT/r/PSBTBT( $n/p$ )                 |
| Emziane 2011    | 29     | Simulation                | GaAs/r/Ge( $p/n$ )<br>GaAs/r/Ge( $n/p$ )<br>AlGaAs/r/Si( $p/n$ ) |
| Alshkeili 2014  | 28     | Simulation                | CdTe/r/InGaAs( $p/n$ )                                           |
| Marti 2015      | 33, 34 | Simulation                | generic top/r/bottom<br>(both $n/p$ and $p/n$ )                  |
| Adhyaksa 2017   | 45     | Simulation                | perovskite/r/pbIBC                                               |
| Warren 2018     | 3, 16  | Simulation                | GaInP/s/nuIBC                                                    |
| Soeriyada 2018  | 31     | Experiment/<br>Simulation | GaAsP/s/SiGe( $n/p$ )                                            |
| Zou 2018        | 39     | Simulation                | GaNp/r/nuIBC-Si                                                  |
| Rienacker 2019  | 5      | Experiment/<br>Simulation | Single junction nuIBC Si                                         |
| Zhang 2019      | 35     | Simulation                | generic top/r/bottom ( $n/p$ )                                   |
| Santbergen 2019 | 40     | Simulation                | perovskite/r/nuIBC<br>perovskite/s/nuIBC                         |
| Djebbour 2019   | 41     | Simulation                | GaInP/r/nuIBC                                                    |
| Park 2019       | 32     | Experiment                | perovskite/s/Si( $n/p$ )                                         |
| Stradins 2019   | 36     | Simulation                | generic nuIBC, pbIBC                                             |
| Rienaecker 2019 | 44     | Experiment                | single junction pbIBC                                            |
| Schnabel 2019   | 42     | Experiment                | GaInP/s/nuIBC                                                    |
| Tayagaki 2019   | 43     | Experiment                | GaAs/s/nuIBC                                                     |

matches experimental measurements of 3T POLO devices fabricated at ISFH<sup>3,4</sup> and 3TT GaInP/t/nuIBC devices fabricated at NREL.<sup>5</sup> This framework can be used to directly compare different top-cell materials that could be combined with 3T Si bottom cells.

Briefly, the simulation process is outlined in Figure S1. Optical simulations of the generation profile within the Si sub-cell under different top-cells were carried out using SunSolve ray-tracing software from PVLighthouse.<sup>6</sup> All optical data used in these simulations is publicly available or experimentally measured for each material in the stack. This generation profile was then used within a TCAD Sentaurus (Synopsis) simulation package run in mixed mode to calculate the performance state of the the Si device. This approach does not account for luminescent coupling between the cells, but we find that effect is only significant when the top-cell is operated at very low currents, and that does not impact the global maximum power point of the tandem, when both sub-cells are operated near their maximum power points. The tandem device performance was then calculated semi-empirically by combining NREL-certified experimental current-voltage data of the relevant top cell and calculating all states of the system where the currents through the  $F$  node of the device are equal. Simulated current data is scaled based on the area of the simulated devices ( $I_{sim}/\text{area}_{3TT}$ ), and therefore reported as current density (J [mA/cm<sup>2</sup>]) throughout the main text.

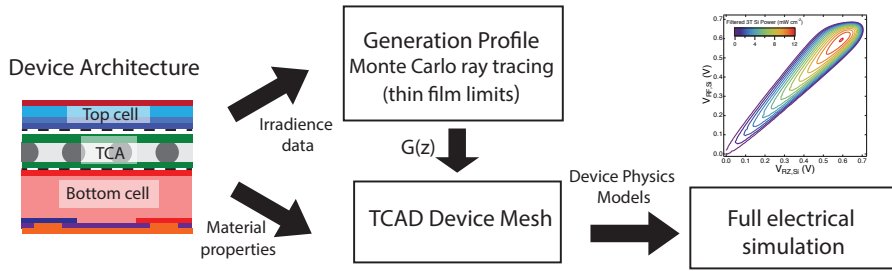

Figure S1: Schematic of process flow for generating simulated performance data.

The sign convention for calculating power through each load was set so that the maximum power point of the cell would always graphically be in the first quadrant to allow direct comparison between configurations. The equations below apply to nuIBC- or pbIBC-based tandems. The signs would be reversed for puIBC- or nbIBC-based tandems. For  $s$

connections,  $V_{topcell} = (V_F - V_T)$ . For  $r$  connections,  $V_{topcell} = (V_T - V_F)$ .

For  $s$  connection  $CR$  mode (Eq. 1):

$$P_{RZ} = J_Z * (V_R - V_Z); P_{RT} = J_{topcell} * (V_{topcell} + V_R - V_F) \quad (1)$$

For  $s$  connection  $CZ$  mode (Eq. 2):

$$P_{RZ} = J_R * (V_R - V_Z); P_{ZT} = J_{topcell} * (V_{topcell} + V_Z - V_F) \quad (2)$$

For  $r$  connection  $CR$  mode (Eq. 3):

$$P_{RZ} = J_Z * (V_R - V_Z); P_{TR} = J_{topcell} * (V_{topcell} + V_F - V_R) \quad (3)$$

For  $r$  connection  $CZ$  mode (Eq. 4):

$$P_{RZ} = J_R * (V_R - V_Z); P_{TZ} = J_{topcell} * (V_{topcell} + V_F - V_Z) \quad (4)$$

## References

- (1) Warren, E. L.; Deceglie, M. G.; Rienäcker, M.; Peibst, R.; Tamboli, A. C.; Stradins, P. Maximizing tandem solar cell power extraction using a three-terminal design. *Sustainable Energy & Fuels* **2018**, *2*, 1141–1147.
- (2) Warren, E.; Rienäcker, M.; Schnabel, M.; Deceglie, M.; Peibst, R.; Tamboli, A.; Stradins, P. Operating principles of three-terminal solar cells. *Proceedings of the 46th IEEE WCPEC* **2018**, 2648–2650.
- (3) Rienäcker, M.; Warren, E. L.; Schnabel, M.; Schulte-Huxel, H.; Niepelt, R.; Brendel, R.; Stradins, P.; Tamboli, A. C.; Peibst, R. Back-contacted bottom cells with three terminals: Maximizing power extraction from current-mismatched tandem cells. *Prog. Photovoltaics* **2019**, *27*, 410–423.
- (4) Rienäcker, M.; Warren, E. L.; Wietler, T. F.; Stradins, P.; Tamboli, A. C.; Peibst, R. Three-Terminal Bipolar Junction Bottom Cell as Simple as PERC: Towards Lean Tandem Cell Processing. *Proceedings of 46th IEEE PVSC* **2019**,
- (5) Schnabel, M.; Schulte-Huxel, H.; Rienäcker, M.; Warren, E. L.; Ndionne, P.; Nemeth, B.; Klein, T. R.; van Hest, M. F. A. M.; Geisz, J. F.; Peibst, R.; Stradins, P.; Tamboli, A. C. Three-terminal III–V/Si tandem solar cells enabled by a transparent conductive adhesive. *Sustainable Energy & Fuels* **2019**,
- (6) PVLighthouse and SunSolve<sup>TM</sup>, <https://www.pvlighthouse.com.au>; accessed 25 November 2019.
